# Supplementary material for: Trends in characteristics and outcomes among US adults hospitalised with COVID-19 throughout 2020: an observational cohort study
Source: HighWire-hosted journal article supplement (doi:10.1136/bmjopen-2021-055137), 2022-02-01

# Supplemental Figure 5. Monthly Death Proportions Per Clinical Cohort Subsets

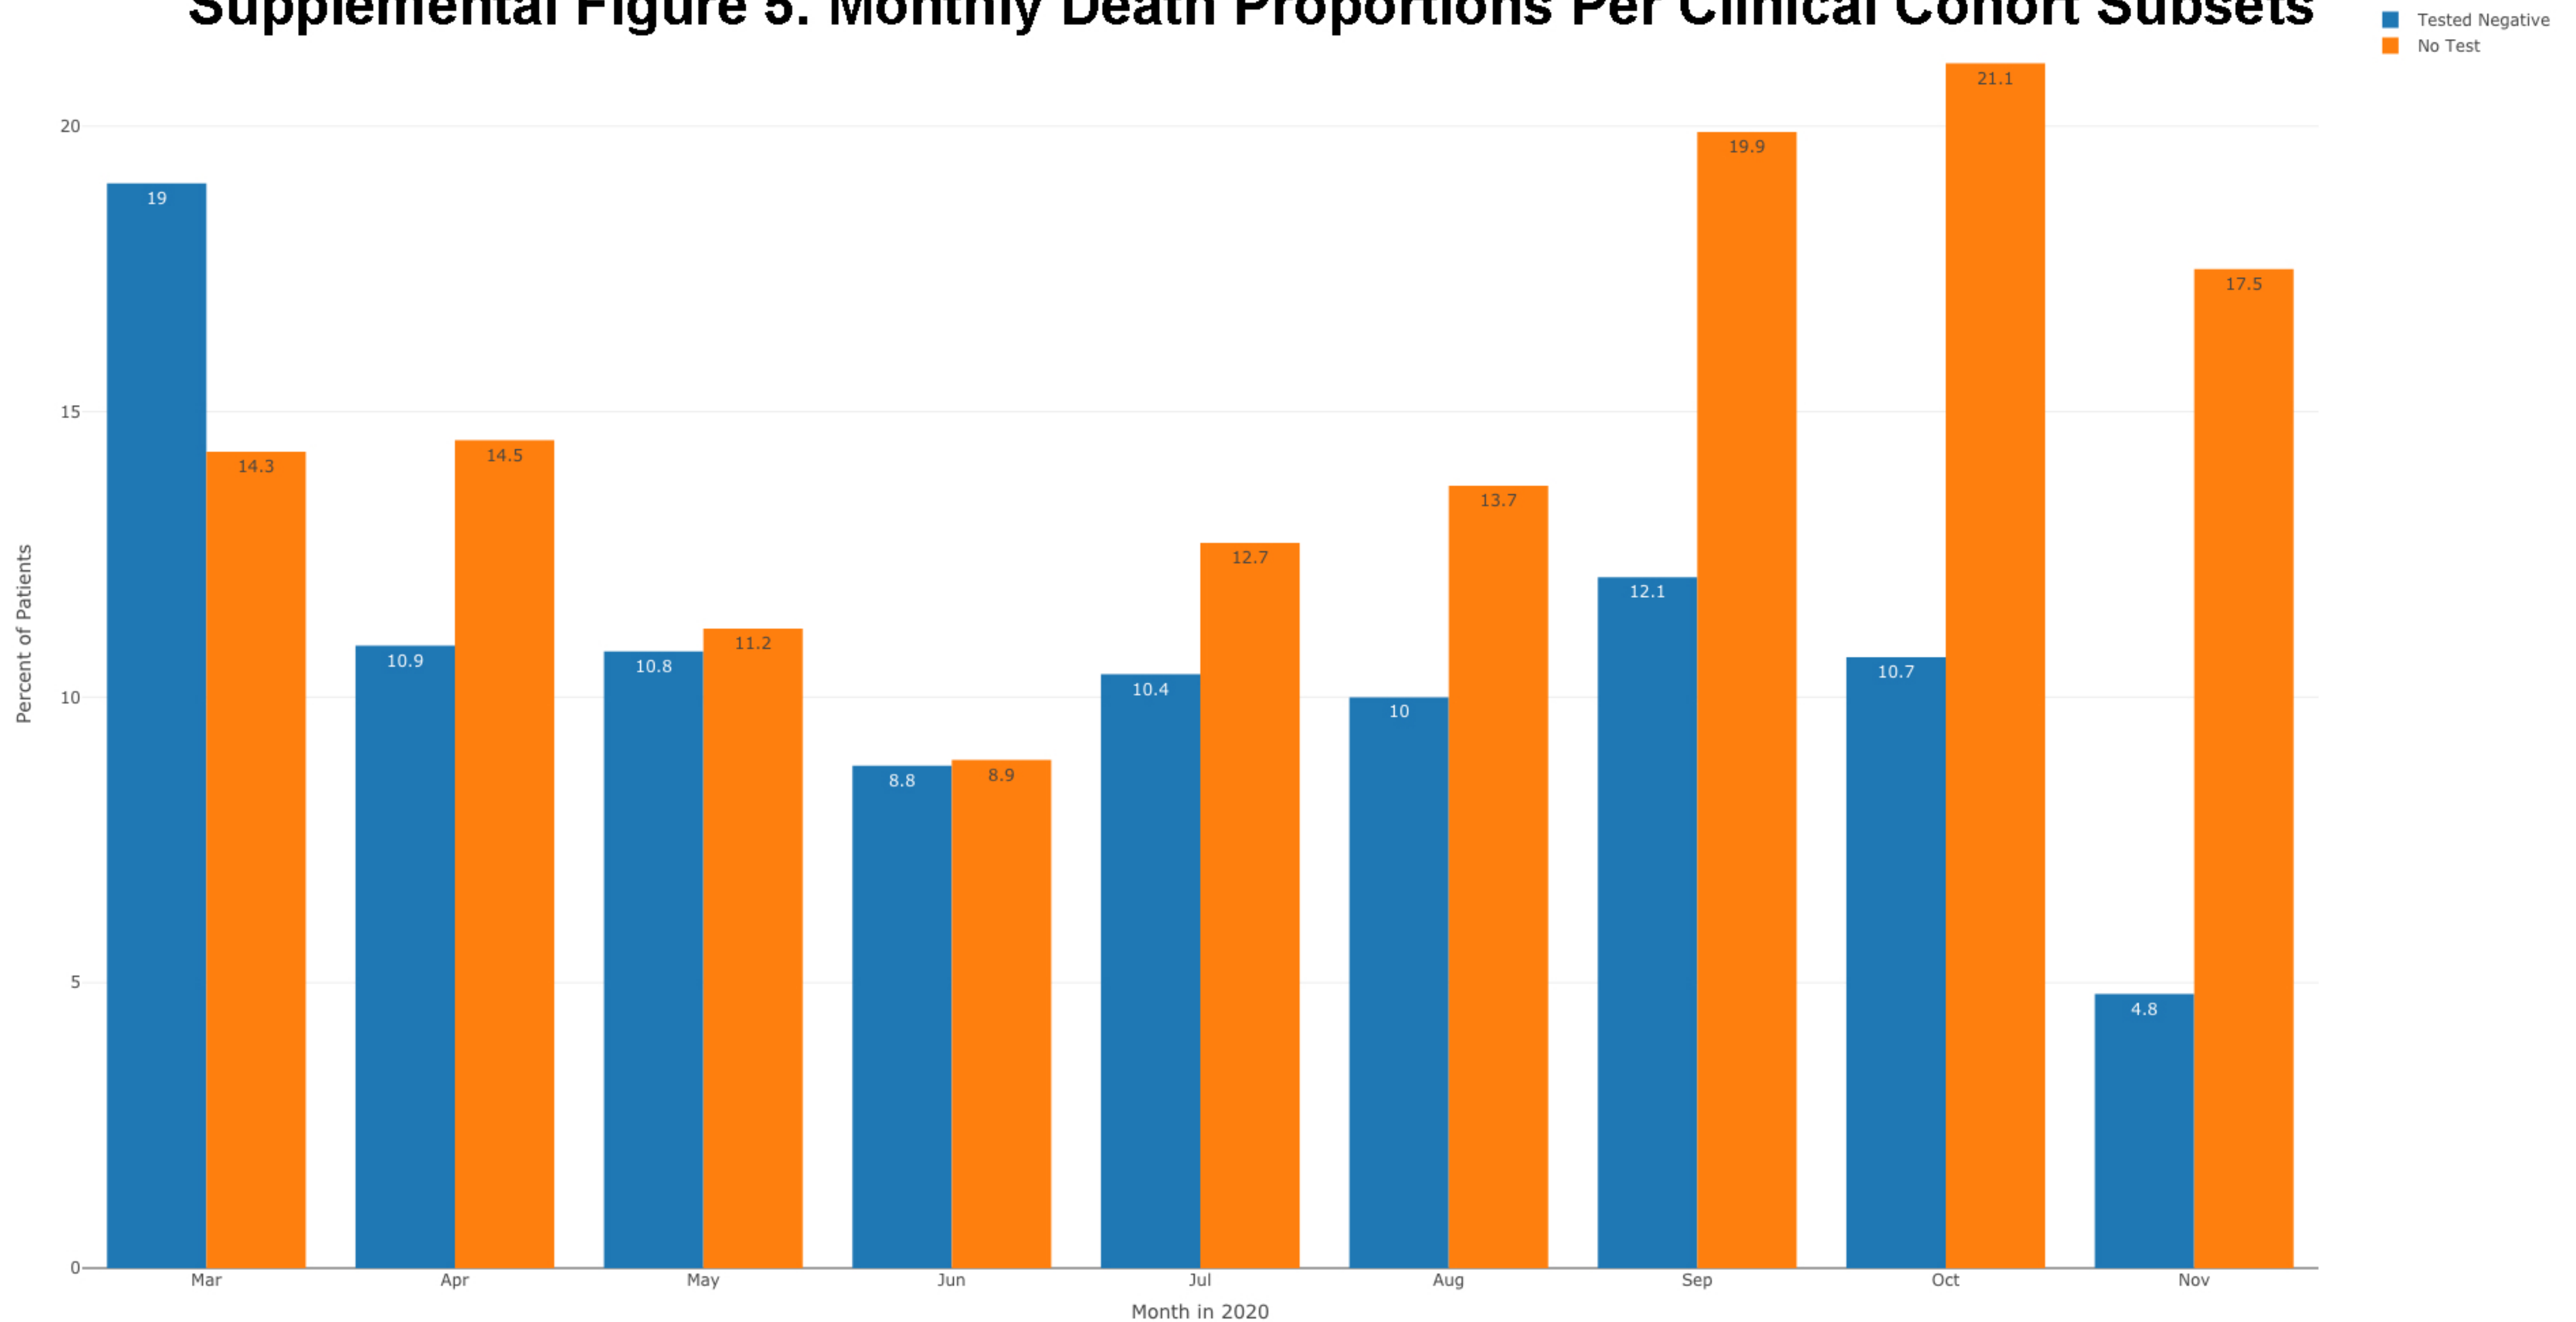

Supplement: bmjopen-2021-055137supp006_data_supplement.pdf [file bmjopen-2021-055137supp006_data_supplement.pdf]
