# Supplementary material for: Trends in characteristics and outcomes among US adults hospitalised with COVID-19 throughout 2020: an observational cohort study
Source: HighWire-hosted journal article supplement (doi:10.1136/bmjopen-2021-055137), 2022-02-01

**Supplemental Figure 7. Cumulative Risk of All Outcomes by Age Group and Time Period, Laboratory Positive Cohort**

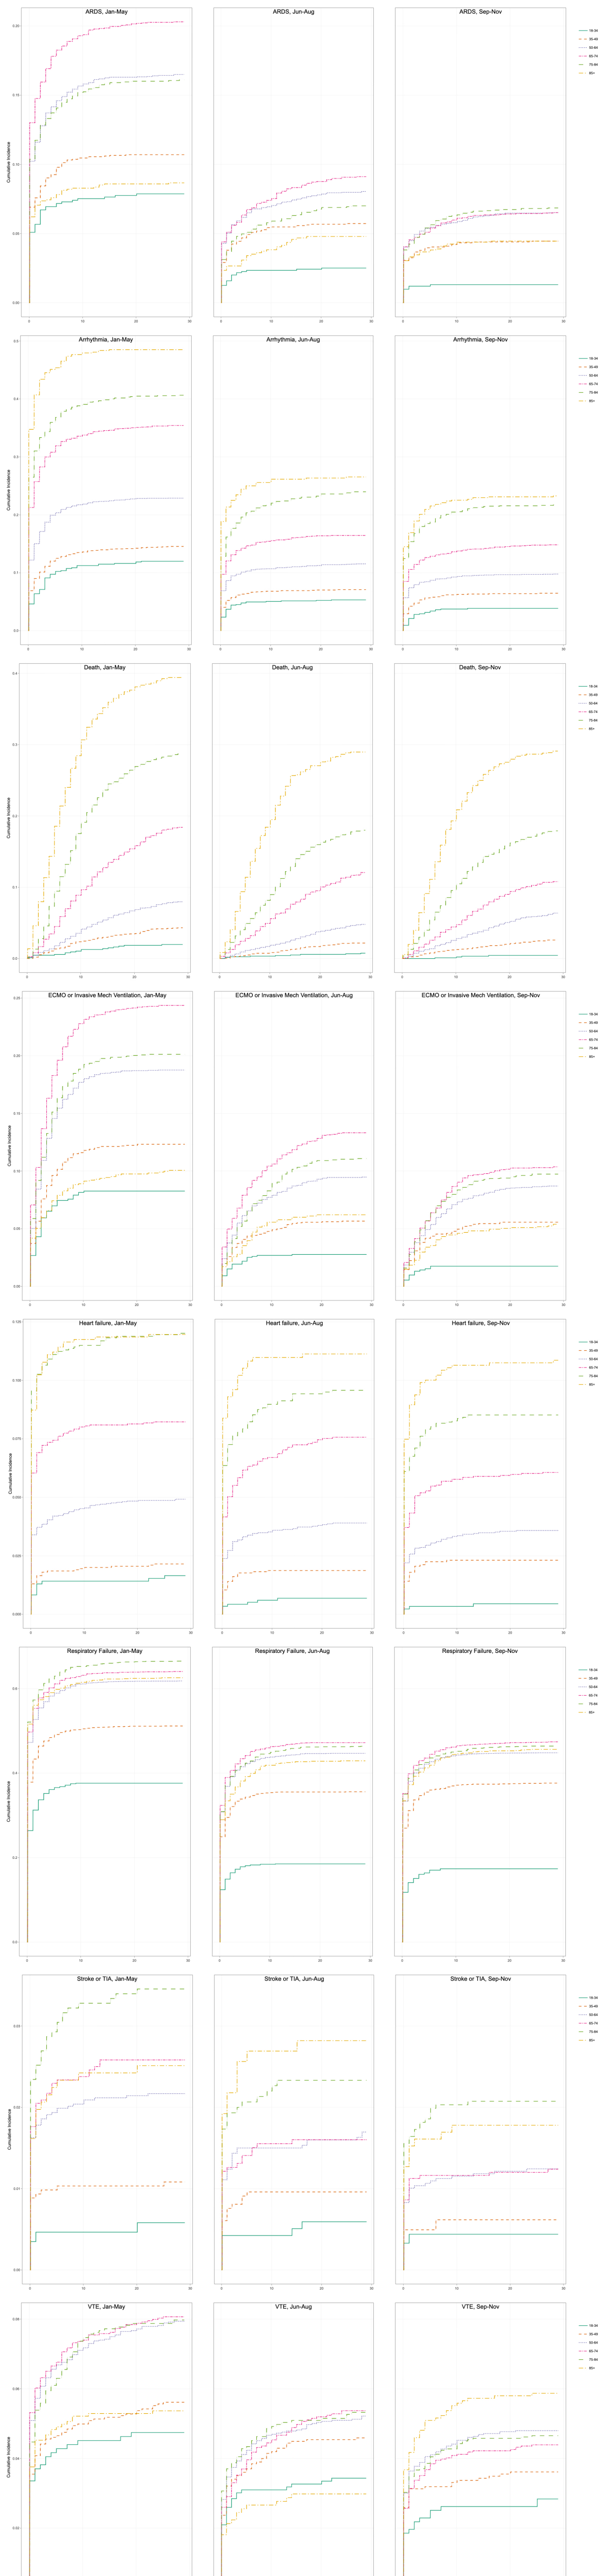

Supplement: bmjopen-2021-055137supp008_data_supplement.pdf [file bmjopen-2021-055137supp008_data_supplement.pdf]
